# Supplementary material for: Lifestyle and Progression to Type 2 Diabetes in a Cohort of Workers with Prediabetes
Source: PubMed Central journal article supplement (PMC7284825; doi:10.3390/nu12051538), 2020-05-25
Supplement: nutrients-12-01538-s001.pdf [file nutrients-12-01538-s001.pdf]

Supplementary Material

Table S1. Association between final glycaemic status after 5 years of follow-up and studied variables (n=23,293).

| Variables                        | Crude Odds Ratios     |                       | Adjusted Model         |                        |
|----------------------------------|-----------------------|-----------------------|------------------------|------------------------|
|                                  | Normalized OR (CI95%) | Progressed OR (95%CI) | Normalized aOR (CI95%) | Progressed aOR (95%CI) |
| Age                              | 0.98 (0.97-0.98)***   | 1.05 (1.04-1.05)***   | 0.99 (0.99-0.99)***    | 1.11 (1.10-1.12)***    |
| Male                             | 0.80 (0.75-0.85)***   | 0.90 (0.83-0.97)**    | 0.95 (0.88-1.03)       | 1.16 (1.01-1.34)*      |
| Blue-collar                      | 0.98 (0.92-1.05)      | 1.07 (0.98-1.16)      | 1.02 (0.94-1.10)       | 0.74 (0.64-0.86)***    |
| BMI                              | 0.84 (0.83-0.85)***   | 1.55 (1.53-1.57)***   | 0.95 (0.94-0.96)***    | 1.76 (1.72-1.81)***    |
| SBP                              | 0.99 (0.98-0.99)***   | 1.02 (1.02-1.03)***   | 1.00 (1.00-1.00)       | 1.00 (1.00-1.00)       |
| TG                               | 0.99 (0.99-0.99)***   | 1.00 (1.00-1.00)***   | 1.00 (1.00-1.00)***    | 1.00 (1.00-1.00)       |
| HbA1c ≤ 6%                       | 1.17 (1.09-1.25)***   | 0.02 (0.02-0.03)***   | 1.05 (0.97-1.13)       | 0.02 (0.01-0.02)***    |
| Diet (daily fruits & vegetables) | 3.53 (3.32-3.76)***   | 0.18 (0.16-0.20)***   | 1.35 (1.24-1.47)***    | 1.15 (0.94-1.40)       |
| PA (≥150 min/week)               | 4.89 (4.59-5.21)***   | 0.03 (0.02-0.03)***   | 2.96 (2.68-3.26)***    | 0.17 (0.12-0.25)***    |
| <b>Smoking</b>                   |                       |                       |                        |                        |
| Former smoker                    | 0.59 (0.54-0.64)***   | 1.03 (0.94-1.13)      | 0.58 (0.53-0.64)***    | 1.92 (1.61-2.29)***    |
| Current smoker                   | 0.96 (0.90-1.02)      | 0.68 (0.63-0.73)***   | 0.89 (0.83-0.95)**     | 1.03 (0.90-1.18)       |

Multinomial logistic regression analysis with persistence in prediabetes as a reference group. OR: Odds Ratio; CI: Confidence Interval \*p<0.05; \*\*p<0.01; \*\*\*p<0.001  
 BMI, Body Mass Index; SBP, Systolic Blood Pressure; TG, Triglycerides; HbA1c, Glycated Hemoglobin; PA, Physical Activity.
